# Supplementary material for: Merging scleractinian genera: the overwhelming genetic similarity between solitary Desmophyllum and colonial Lophelia
Source: BMC Evol Biol. 2016 May 18;16:108. doi: 10.1186/s12862-016-0654-8 (PMC4870751; doi:10.1186/s12862-016-0654-8)
Supplement: Additional file 1: 1.1 — Annotation of the complete mitochondrial genome of D. dianthus (Dd) and L. pertusa (Lp) using DOGMA (Wayman et al. 2014) [77]. 1.2 Genetic divergences among scleractinian species. a. Genetic divergences among mitochondrial genomes of scleractinian species. b. Minimum (MIN) and maximum (MAX) value of genetic divergences (in percentage) among mitochondrial genomes of scleractinian species at inter—and intrageneric taxonomic level. 1.3 Comparison of D. dianthus and L. pertusa allele sizes for 30 microsatellite loci [47]. 1.4 Measurements of Great Calicular Diameter (GCD) and septa number (Septa N.) for 200 specimens of D. dianthus and L. pertusa. 1.5 Genetic divergence between D. dianthus (Dd) and L. pertusa (Lp), or other Dd individuals, Caryophyllia species (C. spp), or other hexacorallian species (Outgroup) [24]. 1.6 Depth, technique, geographic coordinates and other information for samples analysed in this study. 1.7 List of mitochondrial genomes analysed in this study with associated GenBank accession numbers (updated July 2014). (XLSX 53 kb) [file 12862_2016_654_MOESM1_ESM.xlsx]

## Sheet: AdditionalFile1.1
Additional file 1.1. Annotation of mitochondrial complete genome od D. dianthus (Dd) and L. Pertusa (Lp) using DOGMA (Wayman et al. 2014).
	LpKC875349		LpKC875348		LpFR821799			Dd432 - Chile IJC			Dd636 - Italy ADR
Gene	start	end	start	end	start	end	Gene	start	end	Gene	start	end
nad5	1	759	1	759	1	759	nad5	1	759	nad5	1	759
nad1	845	1768	845	1768	845	1768	nad1	845	1768	nad1	953	1762
atp6	1824	2519	1824	2519	1824	2519	atp6	1824	2066	atp6	1824	1931
							atp6	1919	2518	atp6	1916	2519
nad4	2522	3964	2522	3964	2522	3964	nad4	2521	3297	nad4	2522	3030
										nad4	2900	3967
rrnS	4876	4919	4876	4919	4876	4919	rrnS	4875	4918	rrnS	4879	4922
cox3	5001	5768	5001	5768	5001	5768	cox3	5000	5767	cox3	5004	5771
cox2	5780	6451	5780	6451	5780	6448	cox2	5779	6369	cox2	5783	6454
							cox2	6359	6451
nad4l	6474	6770	6474	6770	6474	6770	nad4l	6474	6608	nad4l	6477	6605
							nad4l	6587	6769	nad4l	6562	6776
nad3	6787	7116	6787	7116	6787	7116	nad3	6786	7115	nad3	6793	7112
nad5	7175	8272	7175	8272	7175	8272	nad5	7174	8271	nad5	7181	8278
cob	9039	10154	9039	10154	9040	10155	cob	9218	9475	cob	9121	10236
							cob	9471	10334
nad2	10387	11475	10387	11475	10388	11434	nad2	10569	11657	nad2	10469	11557
nad6	11504	11992	11504	11992	11505	11993	nad6	11686	11973	nad6	11586	12074
trnW-uca	12417	12486	12417	12486	12416	12485	trnW-uca	12575	12644	trnW-uca	12498	12567
atp8	12487	12485	12487	12485	12486	12646	atp8	12648	12804	atp8	12571	12720
cox1	12646	14199	12646	14199	12647	14200	cox1	12805	14358	cox1	12731	14284
trnM-cau	14207	14277	14207	14277	14208	14278	trnM-cau	14366	14436	trnM-cau	14292	14362
rrnL	15385	15643	15385	15643	15386	15644	rrnL	15548	15806	rrnL	15467	15725
rrnL	15784	16046	15784	16046	15785	16047	rrnL	15947	16209	rrnL	15864	16126

## Sheet: AdditionalFile1.2a
Additional file 1.2a. Genetic divergences among mitochondrial genomes of scleractinian species.
#	Acroporidae species	1	2	3	4	5	6	7	8	9	10	11	12	13	14	15	16	17	18	19
1	ACR Acropora aspera KF448532	-
2	ACR Acropora digitifera KF448535	0.00027058	-
3	ACR Acropora humilis KF448528	0.00016235	0.00010823	-
4	ACR Acropora florida KF448533	0.0002175	0.00016352	5.437e-05	-
5	ACR Acropora muricata KF448529	0.0002706	0.00032468	0.00021646	0.00016309	-
6	ACR Acropora hyacinthus KF448531	0.00032485	0.00037897	0.00027063	0.00032714	0.00043294	-
7	ACR Acropora divaricata KF448537	0.00108236	0.00124467	0.00113645	0.00119846	0.00113637	0.00108181	-
8	ACR Acropora robusta KF448538	0.00135292	0.00151525	0.00140702	0.00147055	0.00151517	0.00135241	0.00102813	-
9	ACR Acropora nasuta KF448536	0.00167759	0.0018399	0.00173168	0.00179677	0.00173151	0.00173058	0.00124456	0.00151513	-
10	ACR Acropora horrida KF448530	0.00167766	0.00173176	0.00162353	0.00158121	0.00151511	0.00156882	0.00189389	0.00194805	0.00248911	-
11	ACR Acropora tenuis AF338425	0.00507549	0.00534854	0.00523923	0.00528944	0.0052388	0.00523562	0.00491183	0.0050206	0.00545625	0.00551315	-
12	ACR Acropora yongei KF448534	0.00431036	0.00458327	0.00447403	0.00452414	0.00447373	0.00447073	0.00414671	0.00425551	0.00469109	0.00474782	0.0007635	-
13	ACR Isopora palifera KJ634270	0.0245534	0.0246616	0.0245535	0.0231637	0.0247144	0.0245949	0.0246052	0.0246594	0.0249295	0.0251462	0.0239051	0.0231334	-
14	ACR Isopora togianensis KJ634268	0.024466	0.0245746	0.0244662	0.0230754	0.0246273	0.0245072	0.0245179	0.0245723	0.0248427	0.0250605	0.023818	0.0230454	0.00241604	-
15	ACR Anacropora matthai AY903295	0.0596109	0.0596136	0.0596129	0.0595446	0.0596053	0.0597855	0.0594955	0.0594945	0.0596573	0.0597803	0.059606	0.0588561	0.059386	0.0594526	-
16	ACR Montipora cactus AY903296	0.0608845	0.0608873	0.0608867	0.0608182	0.060879	0.0610567	0.0607685	0.0607679	0.060931	0.0610539	0.0608817	0.0601313	0.0599909	0.0600543	0.00654527	-
17	ACR Astreopora explanata KJ634269	0.0623123	0.0623703	0.0623706	0.0622872	0.0623703	0.0622917	0.0621416	0.0620857	0.0626449	0.0625382	0.0632657	0.0625791	0.0634361	0.0633875	0.0714182	0.0728581	-
18	ACR Astreopora myriophthalma KJ634272	0.0628698	0.0629278	0.062928	0.0628452	0.0629242	0.0628459	0.0626957	0.0626398	0.063199	0.0630922	0.0637093	0.0630226	0.0639368	0.0639412	0.0717564	0.0731982	0.0018781
19	ACR Alveopora sp. KJ634271	0.0763048	0.0765291	0.076417	0.076357	0.0762997	0.0763163	0.0764157	0.0766357	0.0764083	0.0765271	0.0775061	0.0768096	0.0771635	0.0771067	0.0651864	0.0663349	0.0770123	0.077	-
#	Agariciidae species	1	2
1	AGA Agaricia humilis DQ643831	-
2	AGA Pavona clavus DQ643836	0.0386114	-
#	Poritidae species	1	2	3
1	POR Goniopora columna JF825141	-
2	POR Porites okinawensis JF825142	0.0429487	-
3	POR Porites panamensis KJ546638	0.0434144	0.0111119	-
#	Pocilloporidae species	1	2	3	4	5	6
1	POC Pocillopora damicornis EF526302	-
2	POC Pocillopora eydouxi EF526303	0.00132099	-
3	POC Pocillopora damicornis EU400213	0.00126357	0.00241115	-
4	POC Seriatopora caliendrum EF633601	0.064837	0.065174	0.0649906	-
5	POC Seriatopora hystrix EF633600	0.0647743	0.0653519	0.0651021	0.00897973	-
6	POC Stylophora pistillata EU400214	0.0578137	0.0582644	0.0583263	0.0350898	0.0361324	-
#	D.dianthus vs L.pertusa Mt complete genome	1	2	3	4	5
1	CAR L. pertusa FR821799-Norway Nordleska	-
2	CAR L. pertusa KC875348-Norway Korallen	0.0009289	-
3	CAR L. pertusa KC875349-Italy SML	0.00086698	6.192e-05	-
4	CAR D. dianthus 636- Italy ADR	0.00831042	0.00800035	0.00793826	-
5	CAR D. dianthus 432-Chile IJC	0.00782462	0.00757687	0.00751511	0.0115654	-
#	D.dianthus vs L.pertusa Mt genome without INDELs	1	2	3	4	5
1	CAR L. pertusa FR821799-Norway Nordleska	-
2	CAR L. pertusa KC875348-Norway Korallen	0.0009289	-
3	CAR L. pertusa KC875349-Italy SML	0.00086698	6.192e-05	-
4	CAR D. dianthus 636-Italy ADR	0.00824731	0.00793727	0.00787516	-
5	CAR D. dianthus 432-Chile IJC	0.00775543	0.00750758	0.00744556	0.00875847	-

## Sheet: AdditionalFile1.2b
Additional file 1.2b. Minimum (MIN) and maximum (MAX) value of genetic divergences (in percentage) among mitochondrial genomes of scleractinian species at inter- and intrageneric taxonomic level.

## Sheet: AdditionalFile1.3
Additional file 1.3. Comparison of allele size of D. dianthus and L. pertusa throughout 30 microsatellites (Addamo et al. 2015 [47]
	D. dianthus		L. pertusa
Locus	min	max	min	max
B4	246	318	275	284
B9	235	292	256	262
B118	157	301	261	296
C6	161	306	216	230
C102	213	345	243	245
C107	244	259	250	256
L7	202	304	237	241
L13	80	141	89	104
L16	98	161	110	110
L22	119	201	155	168
L24	149	232	162	174
L34B	158	240	167	167
L41	132	210	162	168
L50	189	290	194	266
L56	115	156	128	128
L57	109	173	114	120
L58	105	178	117	121
L73	154	190	158	166
L82	101	149	116	134
L83	224	266	227	242
L84	135	250	160	204
L86	143	158	149	149
L90	90	134	102	104
L91	199	245	214	220
L96	93	156	108	114
L98	129	151	135	141
L100	110	147	122	122
L102	123	185	127	140
L107	110	224	158	164
L109	128	203	137	152

## Sheet: AdditionalFile1.4
Additional file 1.4. Measurement of Great Calicular Diameter (GCD) and Septa number (Septa N.) for 200 specimens of D. dianthus and L. pertusa.
*Genetically analysed in Addamo et al. 2012 [24]. MMF = Melilla CWC Mound Field (Alboran Sea, Mediterranean); MM = Moira CWC Mounds
(Porcupine Seabight, NE Atlantic); SML = Santa Maria di Leuca CWC Province (Mediterranean); SS = Sicily Strait (Mediterranean); SA =South Adriatic;
SI = South Ireland; SGC = Southern Gulf of Cadiz (NE Atlantic). Student's two-tailed test: GCD t-value is 0.043, p-value is 0.966 at p < 0.05;
Septa N. t-value is 12.107, p-value is <0.00001 at p < 0.05.
Taxon	GCD	Septa N.	Genetics Analysis	Sample code	Area	LAT	LONG	DEPTH (m)
Desmophyllum	4.49	32		BC 22-2	SML	39°36.72'N	18°30.53'E	631
Desmophyllum	4.2	34		BC 22-1	SML	39°36.72'N	18°30.53'E	631
Desmophyllum	4	36		BC 25-1	MM	51°30.50'N	11°49.48'W	933
Desmophyllum	4.114	36		BC 25-2	MM	51°30.50'N	11°49.48'W	933
Desmophyllum	4.2	38		BC 72-1	SML	39°33.50'N	18°13.24'E	525
Desmophyllum	5	43		BC 72-3	SML	39°33.50'N	18°13.24'E	525
Desmophyllum	5	44		BC 25-3	MM	51°30.50'N	11°49.48'W	933
Desmophyllum	4.38	46		BC 72-2	SML	39°33.50'N	18°13.24'E	525
Desmophyllum	4.56	46		MD3456_BC	MMF	35°26.17'N	2°30.82'W	330
Desmophyllum	9.62	46		B091405 - BC-5	SGC	35°17.39' N	6°46.99'W	570
Desmophyllum	5	47		BC 22-3	SML	39°36.72'N	18°30.53'E	631
Desmophyllum	9.3	47		ROC F	SA	38°18.03'N	16°29.08'E	unknown
Desmophyllum	9.56	47		MD3471_BC	MMF	35°47.75'N	2°15.15'W	314
Desmophyllum	5.2	48		BC 22-4	SML	39°36.72'N	18°30.53'E	631
Desmophyllum	5.3	48		ROC B	SA	38°18.03'N	16°29.08'E	unknown
Desmophyllum	5.3	48	*	DdSML_188	SML	39°35'22.64''	18°22'59.99''	496.50-481.60
Desmophyllum	5.9	48		BC 05-1	MM	51°26.33'N	11°49.40'W	1069
Desmophyllum	6	48		BC 72-4	SML	39°33.50'N	18°13.24'E	525
Desmophyllum	6.3	48		BC 22-5	SML	39°36.72'N	18°30.53'E	631
Desmophyllum	6.7	48		BC 72-5	SML	39°33.50'N	18°13.24'E	525
Desmophyllum	7	48		BC 22-6	SML	39°36.72'N	18°30.53'E	631
Desmophyllum	7.3	48		B091405 - BC-1	SGC	35°17.39' N	6°46.99'W	570
Desmophyllum	7.7	48	*	DdMAL_247	SS	35°30.28'N	14°11.27'E	690-462
Desmophyllum	7.95	48		BC 22-7	SML	39°36.72'N	18°30.53'E	631
Desmophyllum	8.2	48		BC 22-8	SML	39°36.72'N	18°30.53'E	631
Desmophyllum	9.1	48		MD3471_BC	MMF	35°47.75'N	2°15.15'W	314
Desmophyllum	9.38	48	*	DdGEL_288	SS	36°45.23'N	14°00.6'E	824-850
Desmophyllum	9.41	48	*	DdSML_33	SS	39°33.14'N	18°13.17E	548-538
Desmophyllum	10.2	48		M70-1/108	SA	41°17.47'N	17°16.62'E	663
Desmophyllum	11	48		BC 22-12	SML	39°36.72'N	18°30.53'E	631
Desmophyllum	11.2	48	*	DdROC_180	SS	38°18.03'N	16°29.08'E	unknown
Desmophyllum	12.72	48	*	DdSML_63	SML	39°33.14'N	18°1316.3'E	577-540
Desmophyllum	8	49		B091408 - BC-1	SGC	35°17.74'N	6°47.30'W	533
Desmophyllum	8.2	49		B091405 - BC-2	SGC	35°17.39' N	6°46.99'W	570
Desmophyllum	9.19	49		MD3471_BC	MMF	35°47.75'N	2°15.15'W	314
Desmophyllum	10	49		BC 25-7	MM	51°30.50'N	11°49.48'W	933
Desmophyllum	10.26	49		MD3471_BC	MMF	35°47.75'N	2°15.15'W	314
Desmophyllum	11.35	49	*	DdGEL_266	SS	36°45.23'N	14°00.6'E	824-850
Desmophyllum	12.71	49		B091405 - BC-10	SGC	35°17.39' N	6°46.99'W	570
Desmophyllum	6	50		ROC D	SA	38°18.03'N	16°29.08'E	unknown
Desmophyllum	6.5	50		MD3471_BC	MMF	35°47.75'N	2°15.15'W	314
Desmophyllum	7.1	50		BC 25-5	MM	51°30.50'N	11°49.48'W	933
Desmophyllum	7.2	50		ROC F	SA	38°18.03'N	16°29.08'E	unknown
Desmophyllum	8.3	50		BC 22-9	SML	39°36.72'N	18°30.53'E	631
Desmophyllum	9.47	50		B091405 - BC-4	SGC	35°17.39' N	6°46.99'W	570
Desmophyllum	10	50		B091405 - BC-6	SGC	35°17.39' N	6°46.99'W	570
Desmophyllum	10.32	50		MD3471_BC	MMF	35°47.75'N	2°15.15'W	314
Desmophyllum	12.3	50		LP1	SML	39°33.83'N	18°27.33'E	599
Desmophyllum	7	51		BC 25-4	MM	51°30.50'N	11°49.48'W	933
Desmophyllum	9.76	51		MD3456_BC	MMF	35°26.17'N	2°30.82'W	330
Desmophyllum	6.59	52		MD3471_BC	MMF	35°47.75'N	2°15.15'W	314
Desmophyllum	8.5	52		B091405 - BC-3	SGC	35°17.39' N	6°46.99'W	570
Desmophyllum	10	52		BC 22-11	SML	39°36.72'N	18°30.53'E	631
Desmophyllum	10.2	52		M70-1/108	SA	41°17.47'N	17°16.62'E	663
Desmophyllum	10.52	52		B091405 - BC-7	SGC	35°17.39' N	6°46.99'W	570
Desmophyllum	11.58	52		BC 22-13	SML	39°36.72'N	18°30.53'E	631
Desmophyllum	12.81	52	*	DdGEL_275	SS	36°45.23'N	14°00.6'E	824-850
Desmophyllum	9.1	53		BC 05-2	MM	51°26.33'N	11°49.40'W	1069
Desmophyllum	10	53		BC 22-10	SML	39°36.72'N	18°30.53'E	631
Desmophyllum	8.92	54		MD3456_BC	MMF	35°26.17'N	2°30.82'W	330
Desmophyllum	9.4	54		MD3465_BC	MMF	35°26.05'N	2°30.84'W	346
Desmophyllum	11.4	54		BC 72-6	SML	39°33.50'N	18°13.24'E	525
Desmophyllum	12.61	54		B091405 - BC-9	SGC	35°17.39' N	6°46.99'W	570
Desmophyllum	12.9	54		MD3465_BC	MMF	35°26.05'N	2°30.84'W	346
Desmophyllum	14.2	54		MD3456_BC	MMF	35°26.17'N	2°30.82'W	330
Desmophyllum	11.41	55		MD3456_BC	MMF	35°26.17'N	2°30.82'W	330
Desmophyllum	12.15	55		BC 22-14	SML	39°36.72'N	18°30.53'E	631
Desmophyllum	10.54	56		B091405 - BC-8	SGC	35°17.39' N	6°46.99'W	570
Desmophyllum	11.4	58		MD3471_BC	MMF	35°47.75'N	2°15.15'W	314
Desmophyllum	13	60		TV1-Rocella	SA	38°18.03'N	16°29.08'E	unknown
Desmophyllum	11.51	61	*	DdMAL_215	SS	35°30.28'N	14°11.2'E	690-462
Desmophyllum	11.09	64		BC 31-1	MM	51°29.69'N	11°49.14'W	962
Desmophyllum	12.59	66		BC 22-16	SML	39°36.72'N	18°30.53'E	631
Desmophyllum	10.26	68		BC 05-4	MM	51°26.33'N	11°49.40'W	1069
Desmophyllum	12.58	70		BC 22-15	SML	39°36.72'N	18°30.53'E	631
Desmophyllum	10.26	71		BC 05-3	MM	51°26.33'N	11°49.40'W	1069
Desmophyllum	14.2	71		MD3456_BC	MMF	35°26.17'N	2°30.82'W	330
Desmophyllum	9.57	72		BC 25-6	MM	51°30.50'N	11°49.48'W	933
Desmophyllum	14	72		B091408 - BC-4	SGC	35°17.74'N	6°47.30'W	533
Desmophyllum	14	72		TV4-Rocella	SA	38°18.03'N	16°29.08'E	unknown
Desmophyllum	14.2	72		TV5-Rocella	SA	38°18.03'N	16°29.08'E	unknown
Desmophyllum	14.52	72		M70-1/108	SA	41°17.47'N	17°16.62'E	663
Desmophyllum	12.11	74		MD3471_BC	MMF	35°47.75'N	2°15.15'W	314
Desmophyllum	11	76		BC 05-5	MM	51°26.33'N	11°49.40'W	1069
Desmophyllum	15	76		M70-1/108	SA	41°17.47'N	17°16.62'E	663
Desmophyllum	15	78		BC 22-18	SML	39°36.72'N	18°30.53'E	631
Desmophyllum	13	80		TV2-Rocella	SA	38°18.03'N	16°29.08'E	unknown
Desmophyllum	13.9	80		TV3-Rocella	SA	38°18.03'N	16°29.08'E	unknown
Desmophyllum	13	82		BC 22-21	SML	39°36.72'N	18°30.53'E	631
Desmophyllum	15	83		MD3465_BC	SGC	35°26.05'N	2°30.84'W	346
Desmophyllum	16	83		B091405 - BC-11	SGC	35°17.39' N	6°46.99'W	570
Desmophyllum	16	84		BC 22-20	SML	39°36.72'N	18°30.53'E	631
Desmophyllum	14	87		BC 22-17	SML	39°36.72'N	18°30.53'E	631
Desmophyllum	16	87		BC 22-19	SML	39°36.72'N	18°30.53'E	631
Desmophyllum	13.1	90		B091408 - BC-2	SGC	35°17.74'N	6°47.30'W	533
Desmophyllum	13.45	90		B091408 - BC-3	SGC	35°17.74'N	6°47.30'W	533
Desmophyllum	15.21	90		BC 31-2	MM	51°29.69'N	11°49.14'W	962
Desmophyllum	16	90		BC 05-7	MM	51°26.33'N	11°49.40'W	1069
Desmophyllum	14.07	92		BC 05-6	MM	51°26.33'N	11°49.40'W	1069
Desmophyllum	15.34	92		BC 31-3	MM	51°29.69'N	11°49.14'W	962
Lophelia	4.2	26		BC 22-1	SML	39°36.72'N	18°30.53'E	631
Lophelia	4.49	26		MD3456_BC-1	MMF	35°26.17'N	2°30.82'W	330
Lophelia	4.114	28	*	MEDCOR 09-5	SS	35°30'28.66''	14°11'2.74''	690
Lophelia	4.2	28		BC 25-1	MM	51°30.50'N	11°49.48'W	933
Lophelia	4.32	28	*	MEDCOR 09-4	SS	35°30'28.66''	14°11'2.74''	690
Lophelia	6.1	28		BC 72-4	SML	39°33.50'N	18°13.24'E	525
Lophelia	5	29		BC 72-1	SML	39°33.50'N	18°13.24'E	525
Lophelia	4.38	30		BC 25-2	MM	51°30.50'N	11°49.48'W	933
Lophelia	4.9	30	*	MEDCOR 09-2	SS	35°30'28.66''	14°11'2.74''	690
Lophelia	5.9	30		BC 25-3	MM	51°30.50'N	11°49.48'W	933
Lophelia	7	30		BC 25-4	MM	51°30.50'N	11°49.48'W	933
Lophelia	7.3	30		B091405 - BC-1	SGC	35°17.39' N	6°46.99'W	570
Lophelia	6	31		BC 72-3	SML	39°33.50'N	18°13.24'E	525
Lophelia	6.5	31		MD3471_BC-1	MMF	35°47.75'N	2°15.15'W	314
Lophelia	8	31		B091405 - BC-2	SGC	35°17.39' N	6°46.99'W	570
Lophelia	5.2	32		MD3456_BC-2	MMF	35°26.17'N	2°30.82'W	330
Lophelia	5.3	32	*	MEDCOR09-1	SS	35°30'28.66''	14°11'2.74''	690
Lophelia	5.79	32		MD3456_BC-3	MMF	35°26.17'N	2°30.82'W	330
Lophelia	5.9	32		BC 72-2	SML	39°33.50'N	18°13.24'E	525
Lophelia	6.7	32	*	MEDCOR 09-6	SS	35°30'28.66''	14°11'2.74''	690
Lophelia	7.2	32		MD3456_BC-4	MMF	35°26.17'N	2°30.82'W	330
Lophelia	8.2	32		B091405 - BC-3	SGC	35°17.39' N	6°46.99'W	570
Lophelia	7.6	34		BC 25-5	MM	51°30.50'N	11°49.48'W	933
Lophelia	8.3	34		MD3456_BC-5	MMF	35°26.17'N	2°30.82'W	330
Lophelia	9.47	35		MD3456_BC-6	MMF	35°26.17'N	2°30.82'W	330
Lophelia	10	35		B091405 - BC-7	SGC	35°17.39' N	6°46.99'W	570
Lophelia	12.59	35		BC 22-13	SML	39°36.72'N	18°30.53'E	631
Lophelia	5.14	36	*	MEDCOR 09-3	SS	35°30'28.66''	14°11'2.74''	690
Lophelia	6.3	36		BC 22-3	SML	39°36.72'N	18°30.53'E	631
Lophelia	8.2	36		BC 22-5	SML	39°36.72'N	18°30.53'E	631
Lophelia	8.5	36		B091405 - BC-4	SGC	35°17.39' N	6°46.99'W	570
Lophelia	9	36		BC 72-6	SML	39°33.50'N	18°13.24'E	525
Lophelia	9.41	36		BC 25-7	MM	51°30.50'N	11°49.48'W	933
Lophelia	11	36		BC 72-9	SML	39°33.50'N	18°13.24'E	525
Lophelia	11.4	36		B091405 - BC-11	SGC	35°17.39' N	6°46.99'W	570
Lophelia	11.4	36		MD3456_BC-8	MMF	35°26.17'N	2°30.82'W	330
Lophelia	12.9	36		BC 72-10	SML	39°33.50'N	18°13.24'E	525
Lophelia	6.3	37		BC 72-5	SML	39°33.50'N	18°13.24'E	525
Lophelia	9.19	37		B091405 - BC-6	SGC	35°17.39' N	6°46.99'W	570
Lophelia	10.1	37		MD3465_BC-1	SGC	35°26.05'N	2°30.84'W	346
Lophelia	4.8	38		BC 22-2	SML	39°36.72'N	18°30.53'E	631
Lophelia	6.59	38		MD3471_BC-2	MMF	35°47.75'N	2°15.15'W	314
Lophelia	7.95	38		BC 22-4	SML	39°36.72'N	18°30.53'E	631
Lophelia	8.8	38		B091405 - BC-5	SGC	35°17.39' N	6°46.99'W	570
Lophelia	9.1	38		BC 25-6	MM	51°30.50'N	11°49.48'W	933
Lophelia	9.56	38		MD3471_BC-3	MMF	35°47.75'N	2°15.15'W	314
Lophelia	10.2	38		B091405 - BC-8	SGC	35°17.39' N	6°46.99'W	570
Lophelia	10.32	38		BC 22-8	SML	39°36.72'N	18°30.53'E	631
Lophelia	12	38		BC 22-10	SML	39°36.72'N	18°30.53'E	631
Lophelia	12	38		MD3471_BC-9	MMF	35°47.75'N	2°15.15'W	314
Lophelia	12.58	38		BC 22-12	SML	39°36.72'N	18°30.53'E	631
Lophelia	13	38		B091408 - BC-2	SGC	35°17.74'N	6°47.30'W	533
Lophelia	9.1	39		BC 22-6	SML	39°36.72'N	18°30.53'E	631
Lophelia	9.5	39		BC 25-8	MM	51°30.50'N	11°49.48'W	933
Lophelia	10	39		MD3471_BC-5	MMF	35°47.75'N	2°15.15'W	314
Lophelia	10.8	39		BC 72-7	SML	39°33.50'N	18°13.24'E	525
Lophelia	11.51	39		MD3471_BC-7	MMF	35°47.75'N	2°15.15'W	314
Lophelia	12.11	39		BC 22-11	SML	39°36.72'N	18°30.53'E	631
Lophelia	12.71	39		B091405 - BC-14	SGC	35°17.39' N	6°46.99'W	570
Lophelia	10	40		MD3471_BC-4	MMF	35°47.75'N	2°15.15'W	314
Lophelia	10.2	40		MD3456_BC-7	MMF	35°26.17'N	2°30.82'W	330
Lophelia	10.26	40		BC 25-10	MM	51°30.50'N	11°49.48'W	933
Lophelia	10.52	40		B091405 - BC-9	SGC	35°17.39' N	6°46.99'W	570
Lophelia	10.54	40		B091405 - BC-10	SGC	35°17.39' N	6°46.99'W	570
Lophelia	11.2	40		BC 31-1	MM	51°29.69'N	11°49.14'W	962
Lophelia	11.41	40		BC 22-9	SML	39°36.72'N	18°30.53'E	631
Lophelia	12.15	40		BC 25-11	MM	51°30.50'N	11°49.48'W	933
Lophelia	12.5	40		BC 25-13	MM	51°30.50'N	11°49.48'W	933
Lophelia	14	40		MD3456_BC-9	MMF	35°26.17'N	2°30.82'W	330
Lophelia	10.26	41		BC 22-7	SML	39°36.72'N	18°30.53'E	631
Lophelia	11.58	41		B091405 - BC-12	SGC	35°17.39' N	6°46.99'W	570
Lophelia	10.26	42		BC 25-9	MM	51°30.50'N	11°49.48'W	933
Lophelia	10.89	42		BC 72-8	SML	39°33.50'N	18°13.24'E	525
Lophelia	11.1	42		MD3465_BC-2	SGC	35°26.05'N	2°30.84'W	346
Lophelia	12	42		MD3471_BC-8	MMF	35°47.75'N	2°15.15'W	314
Lophelia	12.3	42		BC 25-12	MM	51°30.50'N	11°49.48'W	933
Lophelia	13.46	42		MD3471_BC-10	MMF	35°47.75'N	2°15.15'W	314
Lophelia	14	42		B091405 - BC-16	SGC	35°17.39' N	6°46.99'W	570
Lophelia	14.07	42		B091408 - BC-3	SGC	35°17.74'N	6°47.30'W	533
Lophelia	10.4	43		MD3471_BC-6	MMF	35°47.75'N	2°15.15'W	314
Lophelia	12.38	43		B091408 - BC-1	SGC	35°17.74'N	6°47.30'W	533
Lophelia	12.72	44		BC 22-14	SML	39°36.72'N	18°30.53'E	631
Lophelia	13	44		BC 72-11	SML	39°33.50'N	18°13.24'E	525
Lophelia	14	44		MD3471_BC-11	MMF	35°47.75'N	2°15.15'W	314
Lophelia	15	44		B091408 - BC-5	SGC	35°17.74'N	6°47.30'W	533
Lophelia	13.81	45		B091405 - BC-15	SGC	35°17.39' N	6°46.99'W	570
Lophelia	12.61	46		B091405 - BC-13	SGC	35°17.39' N	6°46.99'W	570
Lophelia	12.81	46		BC 25-14	MM	51°30.50'N	11°49.48'W	933
Lophelia	13.45	46		BC 25-15	MM	51°30.50'N	11°49.48'W	933
Lophelia	14.2	46		MD3471_BC-12	MMF	35°47.75'N	2°15.15'W	314
Lophelia	13.38	48		BC 31-3	MM	51°29.69'N	11°49.14'W	962
Lophelia	14	48		B091405 - BC-17	SGC	35°17.39' N	6°46.99'W	570
Lophelia	15	48		B091408 - BC-4	SGC	35°17.74'N	6°47.30'W	533
Lophelia	15	48		BC 31-5	MM	51°29.69'N	11°49.14'W	962
Lophelia	16	48		B091405 - BC-19	SGC	35°17.39' N	6°46.99'W	570
Lophelia	13.1	50		BC 31-2	MM	51°29.69'N	11°49.14'W	962
Lophelia	14.2	50		MD3456_BC-10	MMF	35°26.17'N	2°30.82'W	330
Lophelia	15	50		BC 31-4	MM	51°29.69'N	11°49.14'W	962
Lophelia	15.21	50		MD3465_BC-3	SGC	35°26.05'N	2°30.84'W	346
Lophelia	16	50		B091405 - BC-18	SGC	35°17.39' N	6°46.99'W	570

## Sheet: AdditionalFile1.5
Additional file 1.5. Genetic divergence between D. dianthus (Dd) and L. pertusa (Lp), or other Dd individuals, or Caryophyllia species (C.sp), or other Hexacorallia species (Outgroup) analysed in Addamo et al., 2012 [24]
Markers	Dd vs Lp	Dd-Italy vs Dd-Italy	Dd vs C.sp	Dd vs Outgroup
16S	0	0-0,1	4-7	40
COI	1.1	0,0-1,6	7-8	24
ITS	1.6	0,8-1,1	7	66
28S	0	0-0,1	2	19

## Sheet: AdditionalFile1.6
Additional file 1.6. Depth, technique, geographic coordinates and others information of samples genetically analysed in this study
Codigo MNCN	EXPEDITION	Country	Province/State	Precise Locality	Range Depth	Lat (start)	Long (start)	Depth (start)	Lat (end)	Long (end)	Depth (end)	Technique	Date (M/A)
DdADR_635	MEMA12	Italy	South Adriatic	off shore Tricase	786	39º53'468''N	18º55'176''E					Grab	Apr-May 2012
DdADR_636	MEMA12	Italy	South Adriatic	off shore Tricase	786	39º53'468''N	18º55'176''E					Grab	Apr-May 2012
DdARG_472	Patagonia 0209	Argentina	off Argentina/ Falkland Islands	off Argentina/ Falkland Islands	1244	43º17'5.64''S	59º0'3.24''W					Trawl	Feb 2009
DdAUS_566	SS02/2007	Australia	Tasmania	Dory Hill W	1100-1200	44º19'34.536''S	147º7'8.148''E	1100	44º19'33.816''S	147º6'50.436''E	1200	Gear Sled	Apr 2007
DdIJC_432		Chile	Pitipalena fijord- Region XI	Isla Jaime	23	43º46'27''S	72º55'045''W					SCUBA	Feb 2012
DdIJC_433		Chile	Pitipalena fijord- Region XI	Isla Jaime	23	43º46'27''S	72º55'045''W					SCUBA	Feb 2012
DdILC_681		Chile	Region X	Isla Lilihuapi - Comau fijord	20	42° 9'43.82"S	72°35'54.22"W					SCUBA	Aug 2012
DdMNZ_601	TAN0803	New Zealand	Macquaire Ridge	Macquaire Ridge	385	51º3'39.6''S	161º28'40.8''E					Grab, rock sled, epibenthic sleds	Apr 2008
DdSML_62	CORSARO 39	Italy	Ionian Sea	off Santa Maria di Leuca	577-540	39°33'14.8"N	18°13'16.3"E	577	39°33'27.4"N	18°13'111"E	540	Epibenthic dredge	Apr 2006
LpSML272	CORSARO 39	Italy	Ionian Sea	off Santa Maria di Leuca	577-540	39°33'14.8"N	18°13'16.3"E	577	39°33'27.4"N	18°13'111"E	540	Epibenthic dredge	Apr 2006
LpIRL296	EUROFLEETS-CWC Moira	Ireland	off Cork-Galway	Moira Mounds	1069	51º26'33''N	11º49'38''W					Box Corer	June 2012

## Sheet: AdditionalFile1.7
Additional file 1.7. List of 50 mitochondrial genomes analysed in this study with associated GenBank Accession Numbers (update July 2014)
Family	Genus	Species	bp	GenBank Acc. No.
Caryophylliidae	Lophelia	pertusa	16,150	NC_015143
Caryophylliidae	Lophelia	pertusa 302	16.149	KC875348
Caryophylliidae	Lophelia	pertusa 362	16.149	KC875349
Acroporidae	Acropora	aspera	18.479	KF448532
Acroporidae	Acropora	digitifera	18.479	KF448535
Acroporidae	Acropora	divaricata	18.481	KF448537
Acroporidae	Acropora	florida	18.365	KF448533
Acroporidae	Acropora	horrida	18,480	KF448530
Acroporidae	Acropora	humilis	18.479	KF448528
Acroporidae	Acropora	hyacinthus	18.566	KF448531
Acroporidae	Acropora	muricata	18.481	KF448529
Acroporidae	Acropora	nasuta	18.481	KF448536
Acroporidae	Acropora	robusta	18,480	KF448538
Acroporidae	Acropora	tenuis	18.338	AF338425
Acroporidae	Acropora	yongei	18.342	KF448534
Agariciidae	Agaricia	humilis	18.735	DQ643831
Acroporidae	Alveopora	sp.	18.146	KJ634271
Acroporidae	Anacropora	matthai	17.888	AY903295
Rhizangiidae	Astrangia	sp.	14.853	DQ643832
Acroporidae	Astreopora	explanata	18.106	KJ634269
Acroporidae	Astreopora	myriophthalma	18.106	KJ634272
Mussidae	Colpophyllia	natans	16.906	DQ643833
Euphylliidae	Euphyllia	ancora	18.875	JF825139
Fungiacyathidae	Fungiacyathus	stephanus	19.381	JF825138
Poritidae	Goniopora	columna	18.766	JF825141
Acroporidae	Isopora	palifera	18.725	KJ634270
Acroporidae	Isopora	togianensis	18.637	KJ634268
Astrocoenidae	Madracis	mirabilis	16.951	EU400212
Oculinidae	Madrepora	oculata	15.841	JX236041
Merulinidae	Montastraea	annularis	16.138	AP008973
Merulinidae	Montastraea	annularis	16.138	AP008974
Merulinidae	Montastraea	faveolata	16.138	AP008977
Merulinidae	Montastraea	faveolata	16.138	AP008978
Merulinidae	Montastraea	franksi	16.138	AP008975
Merulinidae	Montastraea	franksi	16.137	AP008976
Acroporidae	Montipora	cactus	17.887	AY903296
Mussidae	Mussa	angulosa	17.245	DQ643834
Agariciidae	Pavona	clavus	18.315	DQ643836
Merulinidae	Platygyra	carnosus	16.463	JX911333
Pocilloporidae	Pocillopora	damicornis	17.415	EF526302
Pocilloporidae	Pocillopora	damicornis	17.425	EU400213
Pocilloporidae	Pocillopora	eydouxi	17.422	EF526303
Caryophylliidae	Polycyathus	sp.	15.357	JF825140
Poritidae	Porites	okinawensis	18.647	JF825142
Poritidae	Porites	panamensis	18.628	KJ546638
Poritidae	Porites	porites	18.648	DQ643837
Pocilloporidae	Seriatopora	caliendrum	17,010	EF633601
Pocilloporidae	Seriatopora	hystrix	17.059	EF633600
Siderastreidae	Siderastrea	radians	19.387	DQ643838
Pocilloporidae	Stylophora	pistillata	17.177	EU400214
